# Supplementary material
Source: ML conference proceedings conference paper supplement (https://openaccess.thecvf.com/content/CVPR2026/html/Lin_NexusFlow_Unifying_Disparate_CVPR_2026_paper.html)
Supplement: Supplementary file 1 [file Lin_NexusFlow_Unifying_Disparate_CVPR_2026_supplemental.pdf]

# Supplementary Materials

## A. Supplementary experiments on nuScenes

We conduct comprehensive supplementary experiments to further validate our design choices. First, we investigate the impact of different feature aggregation architectures: comparing MLPs with deformable attention layers (defo.), with results summarized in Table A.1. We observe that as long as the key coupling layer is present, performance remains stable, and architectures equipped with deformable attention achieve even stronger results. In contrast, removing the coupling layer leads to a substantial performance drop. These findings further confirm that our invertible transformations provide reliable alignment of feature distributions across heterogeneous tasks while effectively mitigating dimensionality collapse.

We also evaluate two geographically partitioned supervision settings. The Standard Geo-Split (S-Geo) setup follows our main protocol, where mapping supervision is available only in **Boston** and tracking supervision only in **Singapore**. We additionally introduce a Reversed Geo-Split (R-Geo) configuration that swaps the supervision visibility across regions. This complementary variant allows us to assess the consistency of our method under geographically perturbed supervision, with results reported in Table A.2.

Table A.1. **Supplementary experiments on nuScenes (Architecture)**. We evaluate different settings on nuScenes dataset with different feature aggregation architectures.

| Method                    | Multi-object Tracking |                    |                   |                  | Online Mapping (IoU %) |                     |                    |                     |
|---------------------------|-----------------------|--------------------|-------------------|------------------|------------------------|---------------------|--------------------|---------------------|
|                           | AMOTA $\uparrow$      | AMOTP $\downarrow$ | Recall $\uparrow$ | IDS $\downarrow$ | Lanes $\uparrow$       | Drivable $\uparrow$ | Divider $\uparrow$ | Crossing $\uparrow$ |
| Baseline                  | 0.289                 | 1.488              | 0.362             | 1025             | 27.1                   | 62.7                | 22.6               | 14.1                |
| Ours (MLP w/o Inv)        | 0.214                 | 1.507              | 1.355             | 731              | 32.3                   | 56.8                | 27.7               | 21.9                |
| Ours (MLP + Inv)          | 0.316                 | 1.250              | 0.397             | 879              | 36.2                   | 62.31               | 28.80              | 20.75               |
| <b>Ours (defo. + Inv)</b> | <b>0.329</b>          | <b>1.322</b>       | <b>0.428</b>      | <b>690</b>       | <b>37.1</b>            | <b>64.5</b>         | <b>30.0</b>        | <b>22.8</b>         |

Table A.2. **Supplementary experiments on nuScenes (Geo-Split)**. We evaluate two geographically partitioned supervision settings on nuScenes dataset.

| Method              | Multi-object Tracking |                    |                   |                  | Online Mapping (IoU %) |                     |                    |                     |
|---------------------|-----------------------|--------------------|-------------------|------------------|------------------------|---------------------|--------------------|---------------------|
|                     | AMOTA $\uparrow$      | AMOTP $\downarrow$ | Recall $\uparrow$ | IDS $\downarrow$ | Lanes $\uparrow$       | Drivable $\uparrow$ | Divider $\uparrow$ | Crossing $\uparrow$ |
| Baseline            | 0.289                 | 1.488              | 0.362             | 1025             | 27.1                   | 62.7                | 22.6               | 14.1                |
| Ours (R-Geo)        | <b>0.332</b>          | <b>1.304</b>       | <b>0.435</b>      | <b>653</b>       | 36.6                   | 63.8                | 29.7               | 22.5                |
| <b>Ours (S-Geo)</b> | 0.329                 | 1.322              | 0.428             | 690              | <b>37.1</b>            | <b>64.5</b>         | <b>30.0</b>        | <b>22.8</b>         |

## B. Supplementary experiments on NYU-V2

We conduct additional supplementary experiments to validate our design choices on dense prediction tasks. We first examine the impact of different feature aggregation architectures by comparing MLP-based aggregators under the same invertible-layer configuration (3 layers), as shown in Table B.1. We then evaluate the complementary setting in which the feature aggregator is fixed (MLP, 3 layers) while varying the number of invertible layers, with results reported in Table B.2.

Table B.1. **NYU-V2 Results Part 1**. We evaluate settings on NYU-V2 dataset with different MLP layers in feature aggregator.

| Method       | Seg. (IoU) $\uparrow$ | Depth (aErr) $\downarrow$ | Norm. (mErr) $\downarrow$ |
|--------------|-----------------------|---------------------------|---------------------------|
| Baseline     | 26.75                 | 0.6511                    | 35.17                     |
| 1 MLP        | 28.57                 | 0.6841                    | 34.54                     |
| 2 MLP        | 29.46                 | 0.6311                    | 33.42                     |
| <b>3 MLP</b> | <b>31.70</b>          | <b>0.6055</b>             | <b>31.88</b>              |
| 4 MLP        | 29.50                 | 0.6404                    | 33.39                     |
| 5 MLP        | 29.78                 | 0.6268                    | 33.12                     |
| 6 MLP        | 29.85                 | 0.6258                    | 33.05                     |

Table B.2. **NYU-V2 Results Part 2**. We evaluate settings on NYU-V2 dataset with different Invertible layers.

| Method       | Seg. (IoU) $\uparrow$ | Depth (aErr) $\downarrow$ | Norm. (mErr) $\downarrow$ |
|--------------|-----------------------|---------------------------|---------------------------|
| Baseline     | 26.75                 | 0.6511                    | 35.17                     |
| 1 Inv        | 28.20                 | 0.6300                    | 33.50                     |
| 2 Inv        | 29.50                 | 0.6200                    | 33.10                     |
| 3 Inv        | 29.90                 | 0.6250                    | 33.00                     |
| <b>4 Inv</b> | <b>31.70</b>          | <b>0.6055</b>             | <b>31.88</b>              |
| 5 Inv        | 29.80                 | 0.6280                    | 33.20                     |
| 6 Inv        | 27.10                 | 0.6400                    | 34.00                     |
